# Supplementary material
Source: PubMed Central journal article supplement (PMC6258080)
Supplement: NIHMS992477-supplement-1.pdf [file NIHMS992477-supplement-1.pdf]

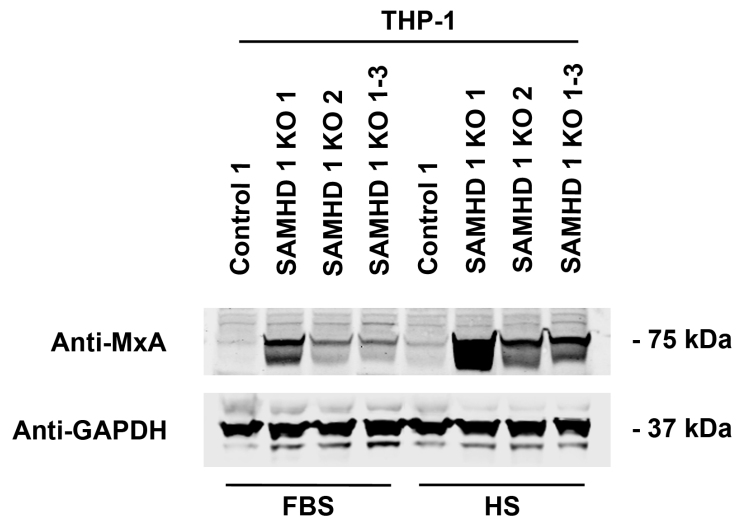

Figure 1S. THP-1 SAMHD KO cell lines incubated with Human Serum (HS) show higher upregulation of MxA protein expression compared with cells incubated with Fetal Bovine Serum (FBS). MxA protein levels were analyzed by Western blotting in the indicated THP-1 SAMHD1 KO clones. Expression levels for THP-1 Control 1 clone are also shown. As a loading control, samples were also analyzed for GAPDH.
